# Supplementary material
Source: publisher figshare collection journal article supplement (https://tandf.figshare.com/articles/dataset/_/7731317)
Supplement: Supplementary file 1 [file 1]

**Supplemental Table 1**. Comparison of physicochemical characterization of bulk tangled (t)MWCNT and rigid (r)MWCNT. ND, not determined.

|  | **tMWCNT** | **rMWCNT** |
| --- | --- | --- |
| **Source** | **Helix, Inc.** | **Mitsui, Inc.** |
| **Trace metals (ICP-MS)1,2**  **Ni**  **Fe** | 0.34%  ND | <0.02%  0.32% |
| **Avg. Diameter (TEM)1,2** | 30-50 nm | 49 + 13.4 nm (SD) |
| **Length (TEM, SEM)1,2** | 0.3-50 µm | 3.86 + 1.94 µm (SD) |
| **BET Surface Area1,3** | 109 m2/g | 26 m2/g |
| **Zeta potential2,4** | 9.2 mV | -11 mV |
| **Static Bending Ratio5** | Db = 0.162 + 0.330 (SD) | Db = 0.899 + 0.274 (SD) |

1Ryman-Rasmussen et al., 2009b; 2Porter et al., 2010; 3Mercer et al., 2011; 4Hilton et al., 2016; 5Duke et al., 2017.
